# Supplementary material
Source: MDPI journal article supplement (https://www.mdpi.com/1424-8247/16/10/1442)

**Table S1:** TaqMan Gene Expression IDs for genes tested

| Gene          | Gene Name                                                        | TaqMan GEA ID |
|---------------|------------------------------------------------------------------|---------------|
| <i>ActB</i>   | Beta-Actin                                                       | Mm02619580_g1 |
| <i>CNR1</i>   | Cannabinoid Receptor 1                                           | Mm01212171_s1 |
| <i>CNR2</i>   | Cannabinoid Receptor 2                                           | Mm02620087_s1 |
| <i>GPR55</i>  | G-protein coupled receptor 55                                    | Mm02621622_s1 |
| <i>FAAH</i>   | Fatty Acid Amide Hydrolase                                       | Mm00515684_m1 |
| <i>MGLL</i>   | Monoglyceride Lipase                                             | Mm00449274_m1 |
| <i>ATF3</i>   | Activating Transcription Factor 3                                | Mm00476033_m1 |
| <i>TRPV1</i>  | Transient Receptor Potential Cation Channel Subfamily V Member 1 | Mm01246300_m1 |
| <i>ADRA2A</i> | Adrenergic Receptor 2A                                           | Mm07295458_s1 |
| <i>ADRA2B</i> | Adrenergic Receptor 2B                                           | Mm00477390_s1 |
| <i>ADRA2C</i> | Adrenergic Receptor 2C                                           | Mm00431686_s1 |
| <i>DRD2</i>   | Dopamine Receptor D2                                             | Mm00438545_m1 |
| <i>GFAP</i>   | Glial Fibrillary Acidic Protein                                  | Mm01253033_m1 |
| <i>OPRM1</i>  | Mu Opioid Receptor 1                                             | Mm01188089_m1 |
| <i>PParG</i>  | Peroxisome Proliferator Activated Receptor Gamma                 | Mm00440940_m1 |

**Figure S1:** qRT-PCR comparisons of gene expression in DRG (L3-L5) of male mice treated with 14 daily injections of CBG versus those treated with 14 daily injections of vehicle. Normalized to beta-actin. Statistical analyses performed by Mann-Whitney test, plotted mean with standard deviation. RQ; relative quotient

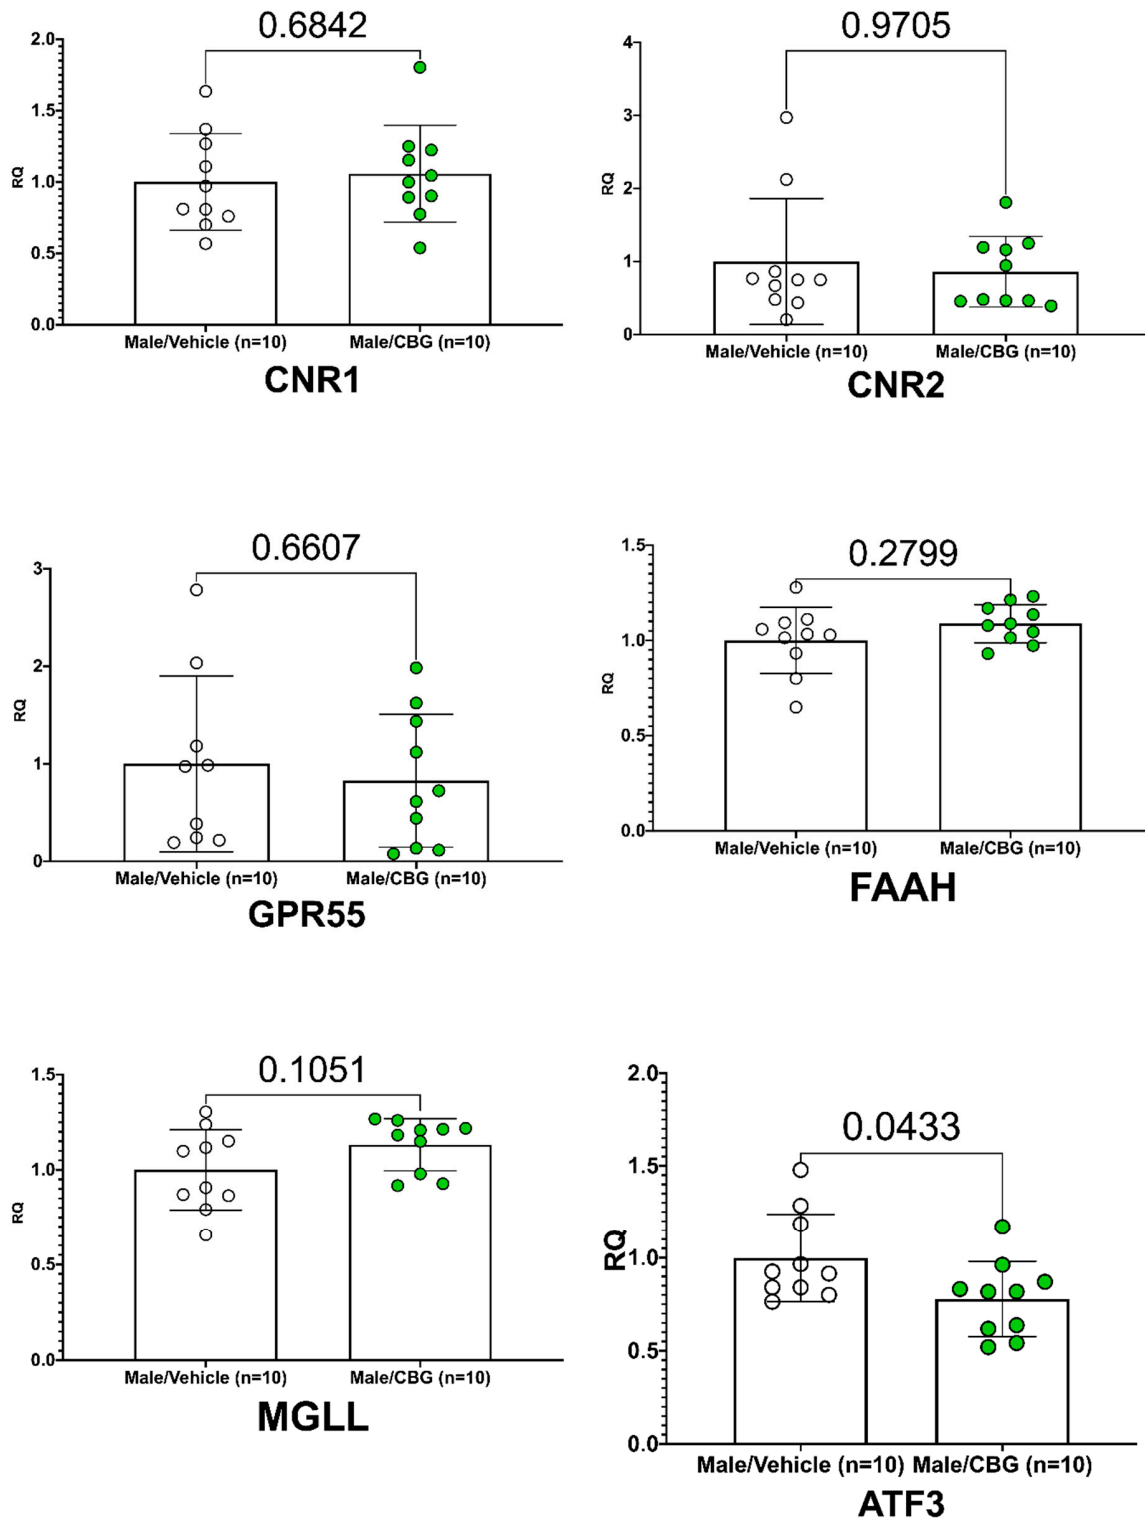

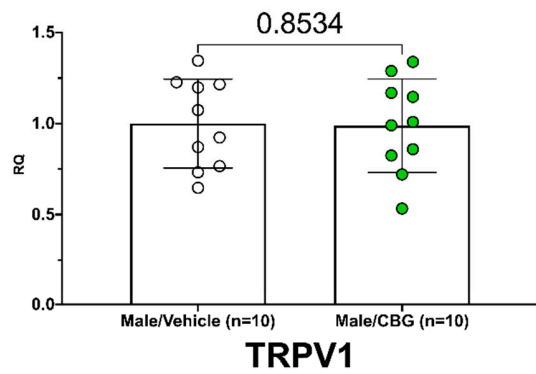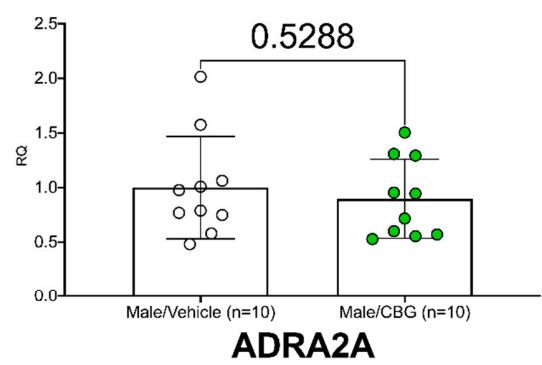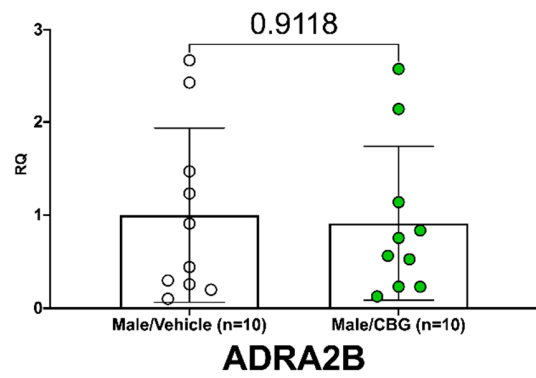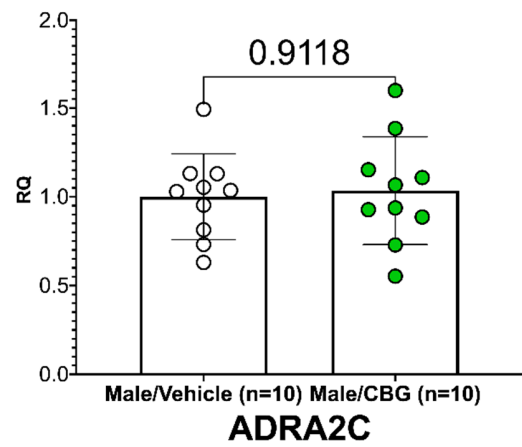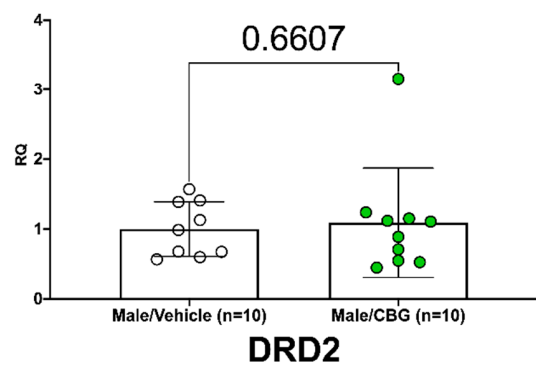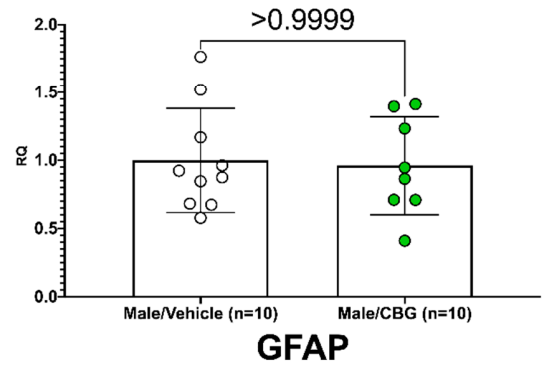

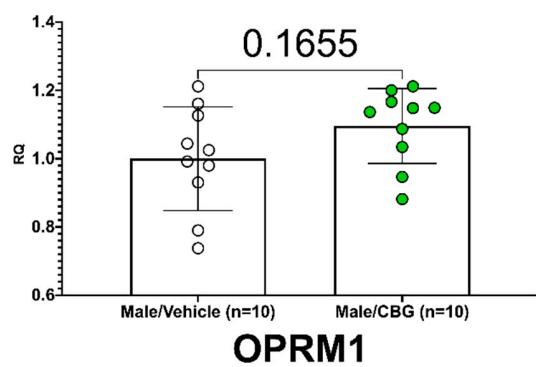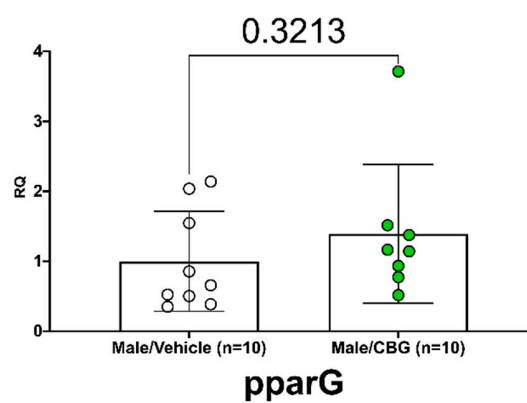

**Figure S2:** qRT-PCR comparisons of gene expression in DRG (L3-L5) of female mice treated with 14 daily injections of CBG versus those treated with 14 daily injections of vehicle. Normalized to beta-actin. Statistical analyses performed by Mann-Whitney test, plotted mean with standard deviation. RQ; relative quotient

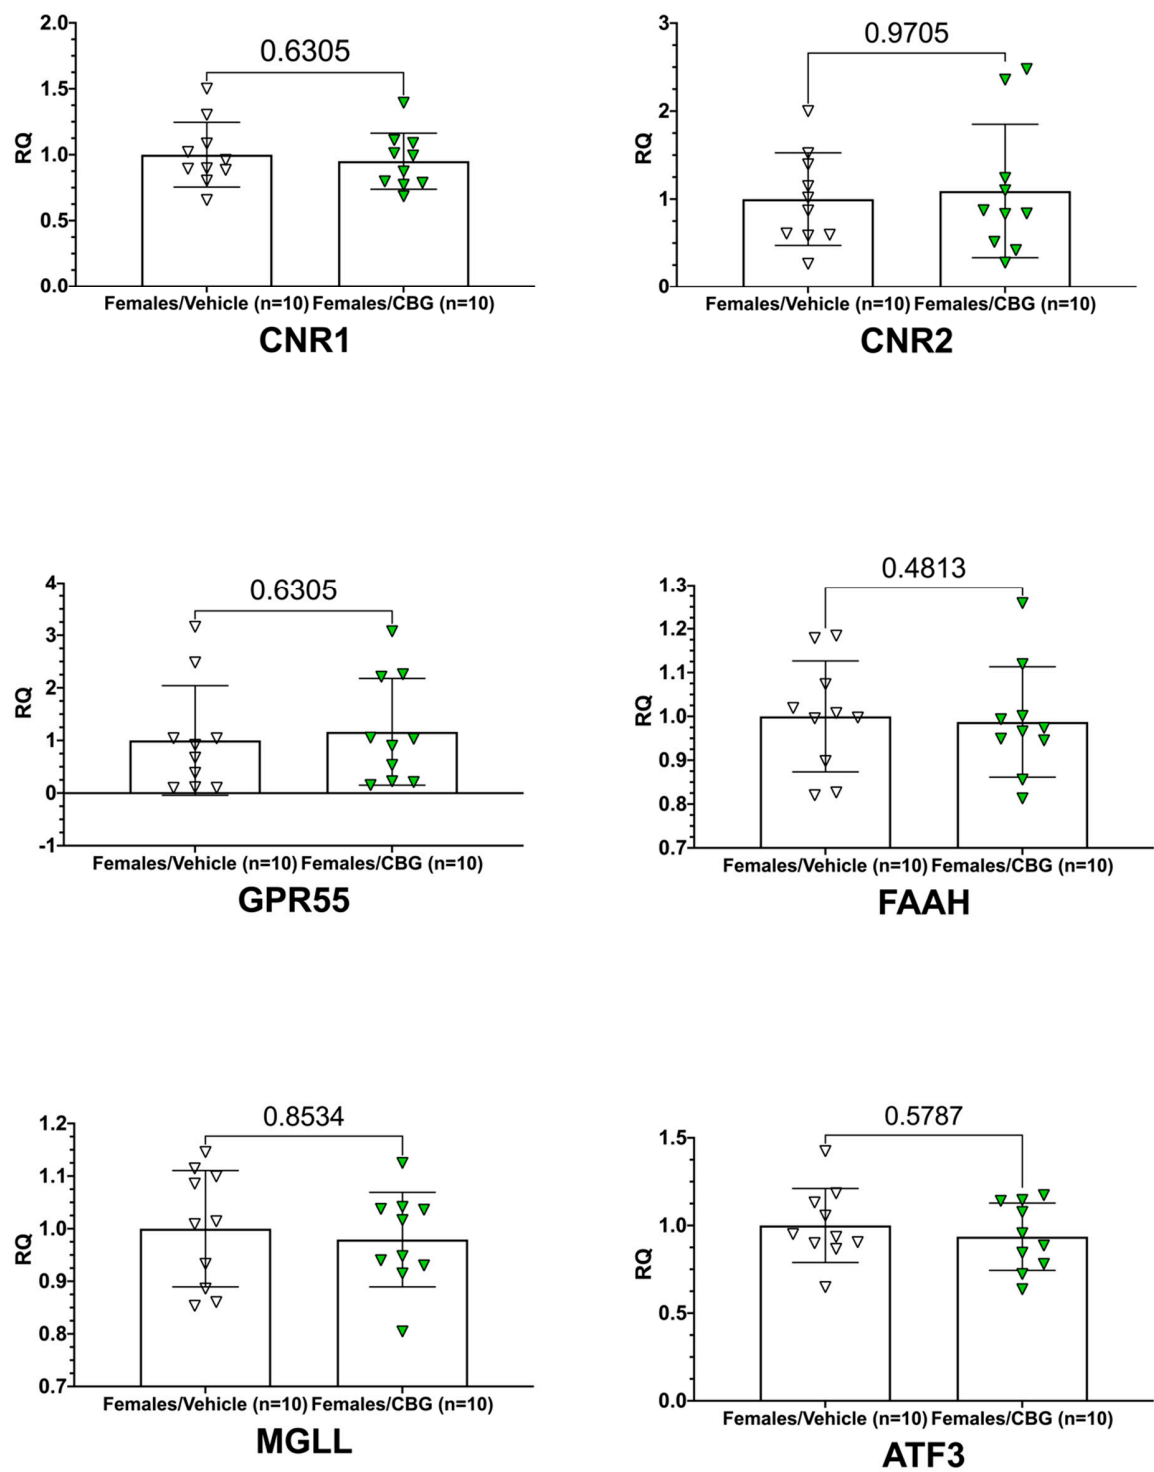

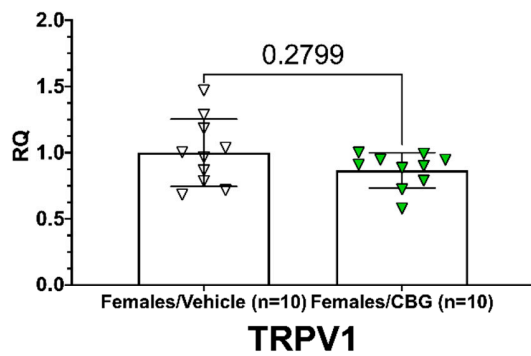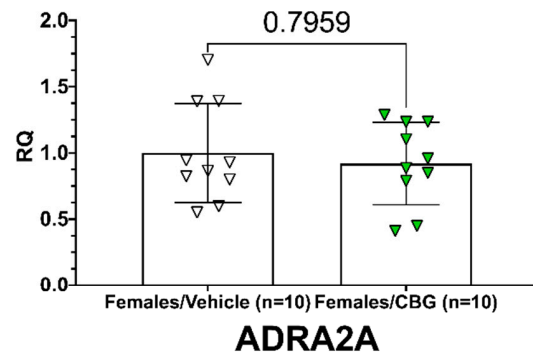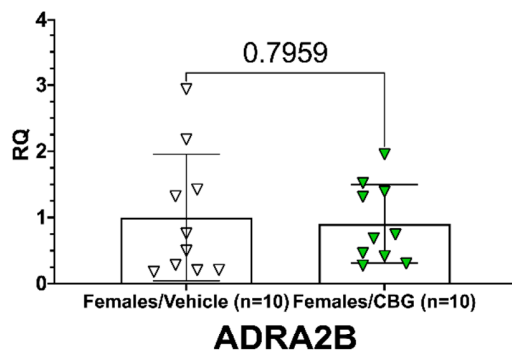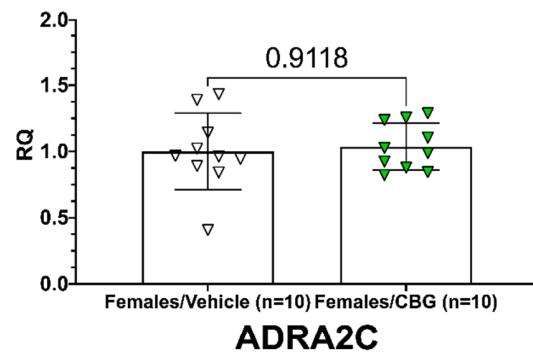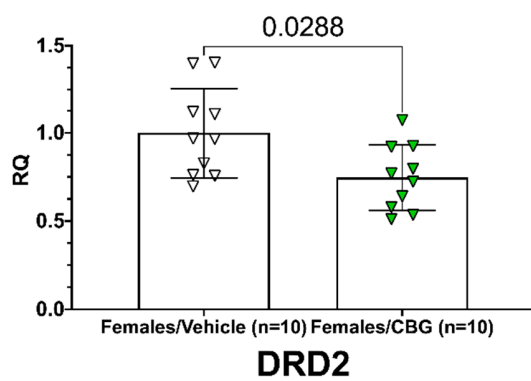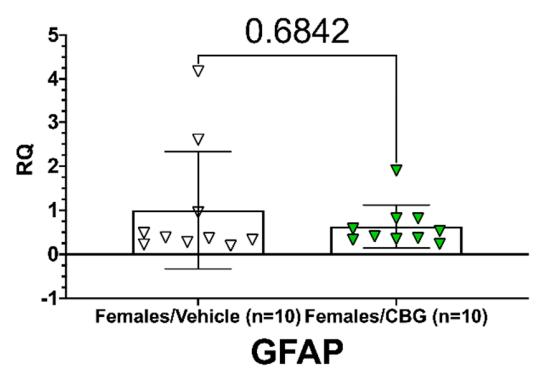

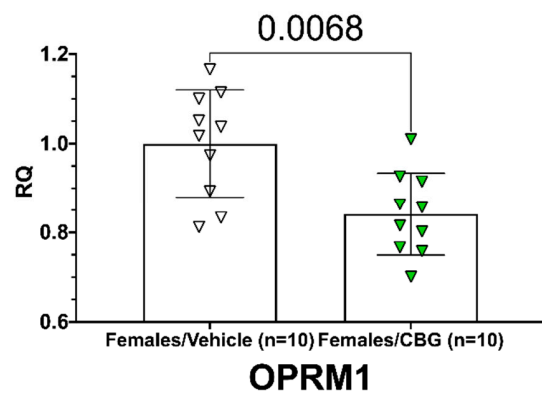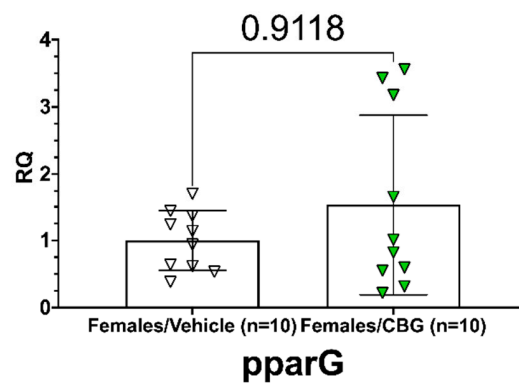

**Figure S3.** Baseline-corrected graph of von Frey recordings of individual male and female baseline scores over time and their acute response to cannabigerol or vehicle. Data gathered one hour after injection. M/Vehicle = Males receiving vehicle. M/CBG = Males receiving cannabigerol. F/Vehicle = Females receiving vehicle. F/CBG = Females receiving cannabigerol. Mean with standard deviation.

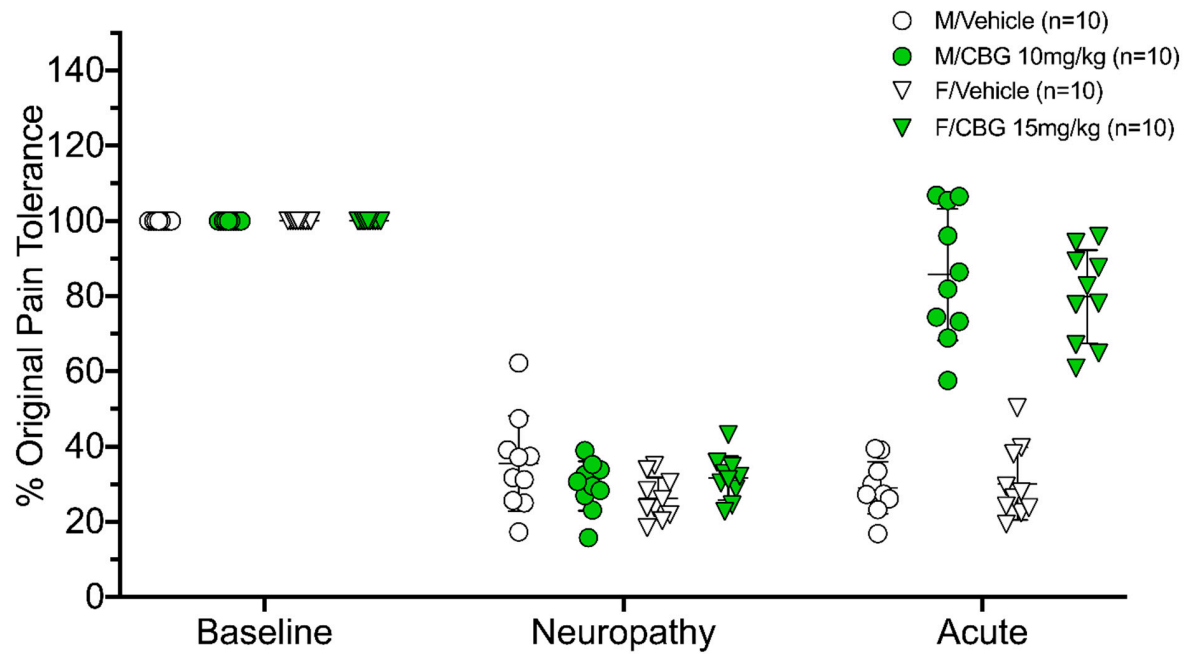



**Figure S4.** Baseline-corrected graph of von Frey recordings of individual male and female baseline scores over time and their chronic response to cannabigerol or vehicle. Data gathered twenty-four hours after seven and fourteen days of injections. M/Vehicle = Males receiving vehicle. M/CBG = Males receiving cannabigerol. F/Vehicle = Females receiving vehicle. F/CBG = Females receiving cannabigerol. Mean with standard deviation.

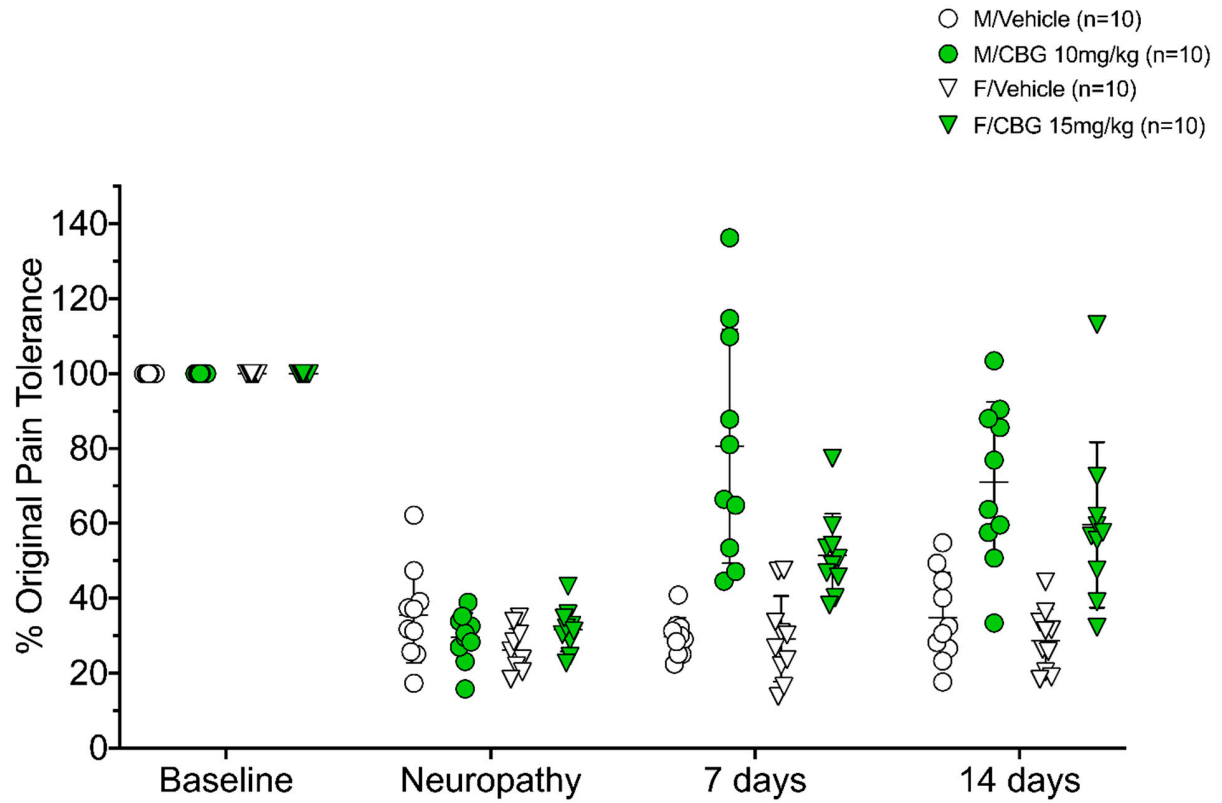

**Figure S5.** Weight over time in male (n=10 for vehicle and CBG) and female mice (n=10 for vehicle and CBG) receiving cannabigerol or vehicle treatments. Mice receiving CBG or vehicle did not experience any significant weight changes during treatment. CBG=Cannabigerol.

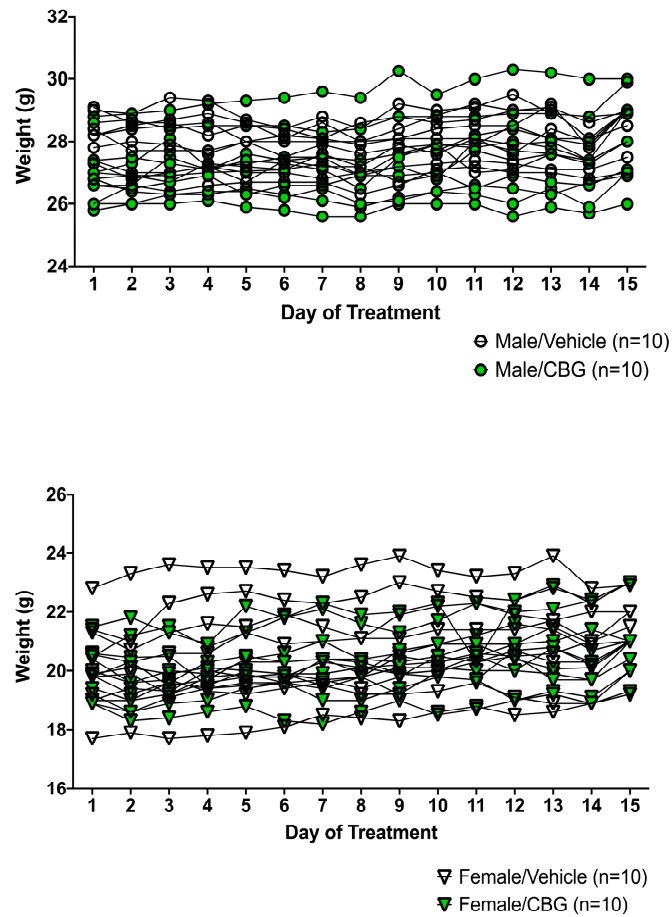

Supplement: s1 [file s1]
